# Supplementary material for: Characterizing Retail Food Environments in Peri-Urban Pakistan during the COVID-19 Pandemic
Source: MDPI journal article supplement (doi:10.3390/ijerph19148614), 2022-07-15
Supplement: s1 [file s1]

Supplementary File

**Table S1. Diversity of Foods Available by Village Size**

$\chi^2$  test for differences in village size

| Food outlets in village catchment n (%) | Small     | Medium     | Large      | <i>p</i>         |
|-----------------------------------------|-----------|------------|------------|------------------|
| <b>Fruits</b>                           |           |            |            |                  |
| Vitamin-A rich fruits                   | 27 (10.0) | 62 (11.3)  | 35 (5.25)  | <b>&lt;0.001</b> |
| Citrus fruits                           | 44 (16.3) | 116 (21.2) | 64 (9.6)   | <b>&lt;0.001</b> |
| Bananas                                 | 46 (17.0) | 101 (18.4) | 65 (9.8)   | <b>&lt;0.001</b> |
| Apples                                  | 37 (13.7) | 93 (17.0)  | 58 (8.7)   | <b>&lt;0.001</b> |
| Other (berries, guava)                  | 37 (13.7) | 97 (17.7)  | 48 (7.2)   | <b>&lt;0.001</b> |
| <b>Vegetables</b>                       |           |            |            |                  |
| Dark leafy green vegetables             | 31 (11.5) | 65 (11.9)  | 87 (13.1)  | 0.733            |
| Vitamin A-rich vegetables               | 33 (12.2) | 63 (11.5)  | 80 (12.0)  | 0.943            |
| <b>Fast-foods</b>                       |           |            |            |                  |
| Namak para                              | 4 (1.5)   | 3 (0.5)    | 21 (3.2)   | <b>0.003</b>     |
| Patties                                 | 5 (1.9)   | 10 (1.8)   | 21 (3.2)   | 0.259            |
| Biryani                                 | 6 (2.2)   | 15 (2.7)   | 29 (4.4)   | 0.153            |
| Chola chat                              | 8 (3.0)   | 21 (3.8)   | 26 (3.9)   | 0.773            |
| Khecha baja                             | 8 (3.0)   | 15 (2.7)   | 13 (2.0)   | 0.553            |
| Samosas                                 | 15 (5.6)  | 35 (6.4)   | 60 (9.0)   | 0.097            |
| Pakora                                  | 19 (7.0)  | 25 (4.6)   | 58 (8.7)   | <b>0.018</b>     |
| Nimko                                   | 19 (7.0)  | 58 (10.6)  | 30 (4.5)   | <b>&lt;0.001</b> |
| <b>Confectionaries</b>                  |           |            |            |                  |
| Balu shahi                              | 2 (0.7)   | 10 (1.8)   | 17 (2.6)   | 0.186            |
| Jalebi                                  | 3 (1.1)   | 5 (0.9)    | 14 (2.1)   | 0.280            |
| Puff pastry                             | 5 (1.9)   | 17 (3.1)   | 15 (2.3)   | 0.484            |
| Boondi                                  | 7 (2.6)   | 7 (1.3)    | 17 (2.6)   | 0.247            |
| Lacho                                   | 10 (3.7)  | 29 (5.3)   | 35 (5.3)   | 0.563            |
| Ice Cream                               | 12 (4.4)  | 13 (2.4)   | 11 (1.7)   | <b>0.042</b>     |
| Gulab Jamun                             | 14 (5.2)  | 37 (6.8)   | 52 (7.8)   | 0.351            |
| Chocolate cake                          | 14 (5.2)  | 27 (4.9)   | 63 (9.5)   | <b>0.004</b>     |
| Barfi                                   | 26 (9.6)  | 79 (14.4)  | 101 (15.2) | 0.077            |
| Sohan halwa                             | 26 (9.6)  | 66 (12.0)  | 86 (12.9)  | 0.375            |
| Sponge cake                             | 33 (12.2) | 76 (13.9)  | 90 (13.5)  | 0.805            |
| Kulfi                                   | 34 (12.6) | 48 (8.8)   | 23 (3.5)   | <b>&lt;0.001</b> |
| Lae                                     | 39 (14.4) | 125 (22.8) | 140 (21.0) | <b>0.018</b>     |
| Cupcake                                 | 55 (20.4) | 132 (24.1) | 194 (29.1) | <b>0.012</b>     |

**Table S2. Variety and Brands of Unhealthy Foods Available by Village Size** $\chi^2$  test for differences in village size

| <b>Food outlets in village catchment n (%)</b> | <b>Small</b> | <b>Medium</b> | <b>Large</b> | <b><i>p</i></b>  |
|------------------------------------------------|--------------|---------------|--------------|------------------|
|                                                |              |               |              |                  |
| <b>Sugar-sweetened Beverages</b>               |              |               |              |                  |
| Nauras                                         | 1 (0.4)      | 3 (0.5)       | 11 (1.7)     | 0.081            |
| Lassi                                          | 2 (0.7)      | 1 (0.2)       | 6 (0.9)      | 0.263            |
| Pakola Soda                                    | 6 (2.2)      | 12 (2.2)      | 60 (9.0)     | <b>&lt;0.001</b> |
| Rooh Afza                                      | 8 (3.0)      | 12 (2.2)      | 42 (6.3)     | <b>&lt;0.001</b> |
| Jam-e-Sheeri (Qarshi)                          | 13 (4.8)     | 28 (5.1)      | 70 (10.5)    | <b>&lt;0.001</b> |
| Al Tunsā                                       | 14 (5.2)     | 32 (5.8)      | 66 (9.9)     | <b>0.008</b>     |
| Tang                                           | 19 (7.0)     | 34 (6.2)      | 59 (8.9)     | 0.206            |
| Sting                                          | 21 (7.8)     | 35 (6.4)      | 85 (12.8)    | <b>&lt;0.001</b> |
| Marinda                                        | 29 (10.7)    | 64 (11.7)     | 121 (18.2)   | <b>&lt;0.001</b> |
| 7up                                            | 29 (10.7)    | 66 (12.0)     | 121 (18.2)   | <b>0.002</b>     |
| Sting                                          | 21 (7.8)     | 35 (6.4)      | 85 (12.8)    | <b>&lt;0.001</b> |
| Pepsi                                          | 31 (11.5)    | 66 (12.0)     | 128 (19.2)   | <b>&lt;0.001</b> |
| Mountain Dew                                   | 33 (12.2)    | 67 (12.2)     | 123 (18.5)   | <b>0.004</b>     |
|                                                |              |               |              |                  |
| <b>Fruit Juice</b>                             |              |               |              |                  |
| Nestle                                         | 7 (2.6)      | 15 (2.7)      | 50 (7.5)     | <b>&lt;0.001</b> |
| Pakola Juice                                   | 18 (6.7)     | 41 (7.5)      | 86 (12.9)    | <b>&lt;0.001</b> |
| Slice                                          | 20 (7.4)     | 26 (4.7)      | 76 (11.4)    | <b>&lt;0.001</b> |
| Popular Polly                                  | 29 (10.7)    | 56 (10.2)     | 114 (17.1)   | <b>&lt;0.001</b> |
|                                                |              |               |              |                  |
| <b>Sweets</b>                                  |              |               |              |                  |
| Jubilee                                        | 10 (3.7)     | 21 (3.8)      | 34 (5.1)     | 0.467            |
| Dairy milk                                     | 12 (4.4)     | 23 (4.2)      | 57 (8.6)     | <b>0.003</b>     |
| Cadbury eclairs                                | 59 (21.9)    | 136 (24.8)    | 174 (26.1)   | 0.391            |
